# Supplementary material for: The analysis of slip tendency of major tectonic faults in Germany
Source: Copernicus journal article supplement (doi:10.5194/se-13-1087-2022), 2022-06-29
Supplement: Supplementary file 2 [file se-13-1087-2022-supplement.zip]

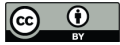

## *Supplement of*

# **The analysis of slip tendency of major tectonic faults in Germany**

**Luisa Röckel et al.**

*Correspondence to:* Luisa Röckel ([luisa.roeckel@kit.edu](mailto:luisa.roeckel@kit.edu))

- [se-13-1087-2022-supplement-title-page.pdf](#)
- Supplement
  - [S1.pdf](#)
  - [Table S1.xlsx](#)

The copyright of individual parts of the supplement might differ from the article licence.
